# Supplementary material for: GSK-3β inhibitor, 9-ING-41, reduces cell viability and halts proliferation of B-cell lymphoma cell lines as a single agent and in combination with novel agents
Source: PubMed Central journal article supplement (PMC5777742; doi:10.18632/oncotarget.22414), 2017-11-11
Supplement: oncotarget-08-114924-s001.pdf [file oncotarget-08-114924-s001.pdf]

## GSK-3 $\beta$ inhibitor, 9-ING-41, reduces cell viability and halts proliferation of B-cell lymphoma cell lines as a single agent and in combination with novel agents

### SUPPLEMENTARY MATERIALS

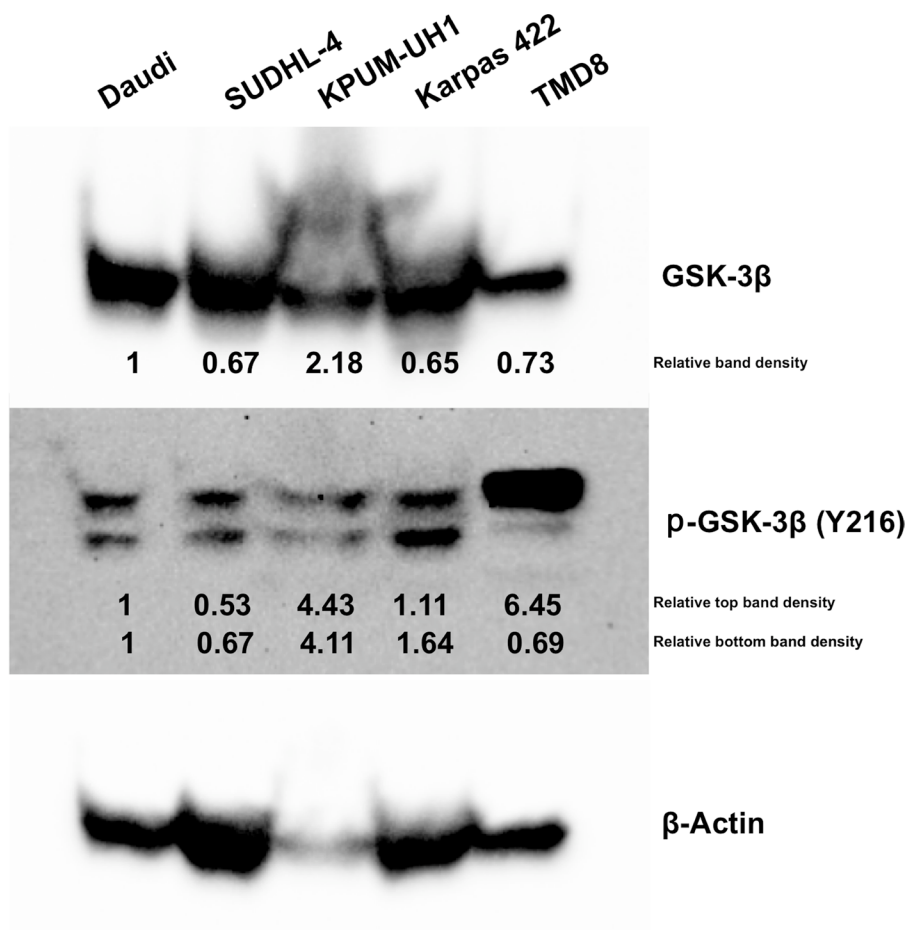

**Supplementary Figure 1: Western blot analysis for GSK-3 $\beta$  protein expression in lymphoma cell lines.** Daudi, SUDHL-4, KPUM-UH1, Karpas 422 and TMD8 cells were lysed and analyzed for total GSK-3 $\beta$ , p-GSK-3 $\beta$  (Y216) and stripped and re-probed for  $\beta$ -Actin (loading control) as described in materials and methods. The band intensities were calculated using Image J (NIH) software and normalized to  $\beta$ -actin control, and the relative values for all cell lines compared to Daudi is shown. Note that p-GSK-3 $\beta$  (Y216) has 2 bands, and the quantification is shown for both. However, the top band may represent the  $\alpha$ -isoform due to the possibility of antibody cross-reactivity and has not been verified.

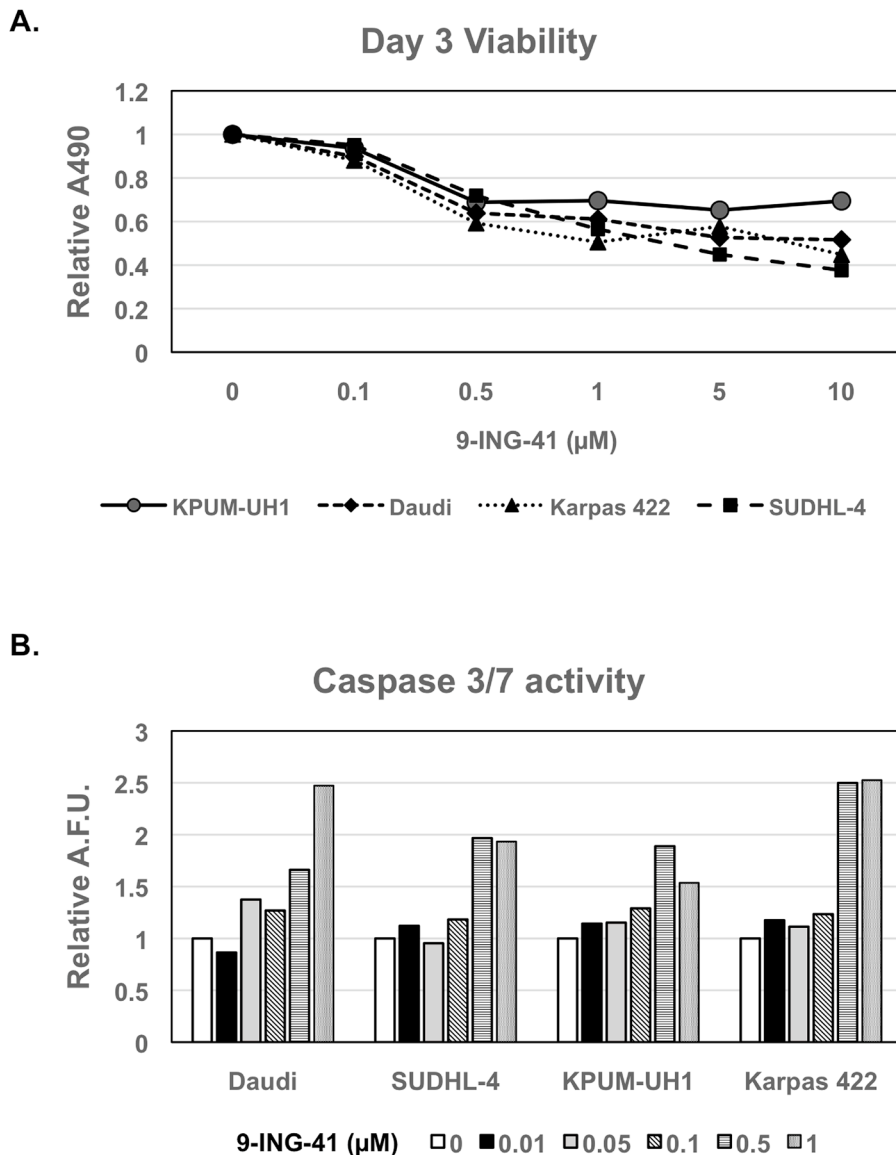

**Supplementary Figure 2: Viability and caspase activity in cells treated with varying concentrations of 9-ING-41.** (A) 50,000 cells were plated in 96-well plate wells and treated with varying concentrations of 9-ING-41. Seventy two hours later, cell viability was determined using, MTS assay. Briefly, 20μl of MTS reagent was added to cells and incubated for 2 hours and, absorbance at 490 nm was read using a Biotek plate reader. Relative absorbance is calculated after setting the average absorbance of the no-treatment control as 1. (B) 100,000 cells were plated in 12-well plate wells in duplicate and treated with varying concentrations of 9-ING-41. Twenty four hours later, cells were lysed and analyzed for caspase 3/7 activity as described in materials and methods. The average of the duplicate is shown in the graph.

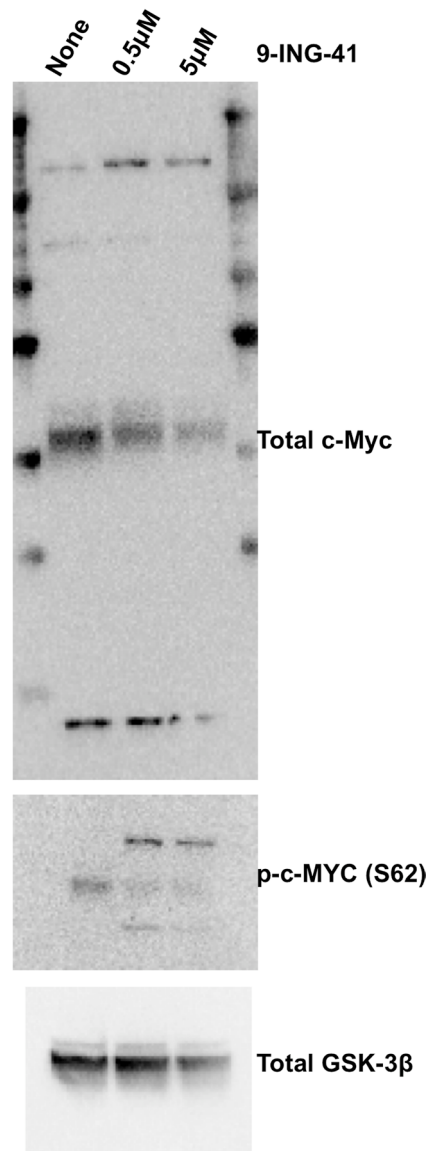

**Supplementary Figure 3: Western blot analysis for c-MYC protein expression in the KPUM-UH1 cell line treated with 9-ING-41.** KPUM-UH1 cells were left untreated or treated with 0.5 or 5 μM 9-ING-41 for 24 hours and lysed and analyzed for total c-MYC, p-c-MYC (Ser62) and total GSK-3β as before. Note the additional bands seen in 9-ING-41-treated conditions for p-c-MYC (Ser 62). The extreme lanes on the right and left are loaded with protein ladder and have cross-reactivity to the c-MYC antibody.

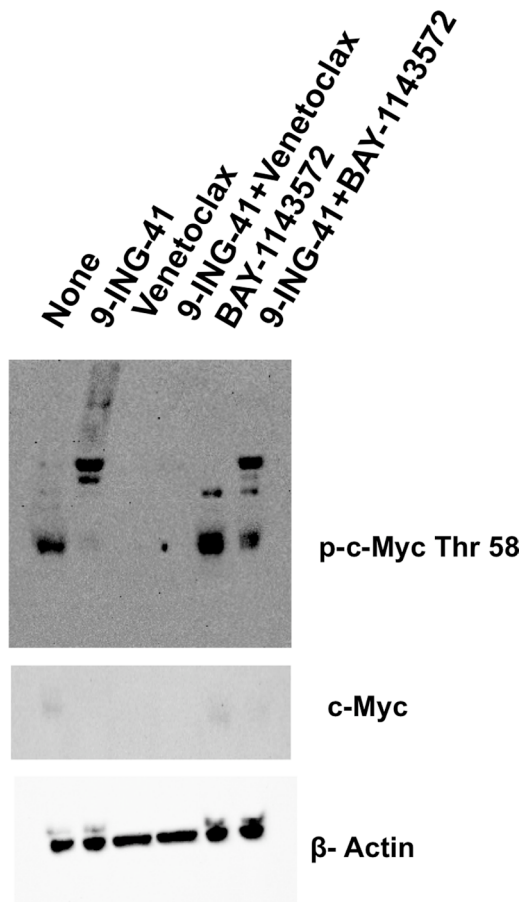

**Supplementary Figure 4: Western blot analysis for c-MYC protein expression in the KPUM-UH1 cell line treated with 9-ING-41 in combination with Venetoclax or BAY-1143572.** KPUM-UH1 cells were left untreated or treated with the following: 0.5uM 9-ING-41; 10nM Venetoclax; the combination of 9-ING-41 and Venetoclax; 1uM BAY-1143572; or the combination of 9-ING-41 and BAY-1143572 for 48 hours and lysed and analyzed for total c-MYC, p-c-MYC (Thr58) and  $\beta$ -Actin as before. Note the additional bands seen in 9-ING-41-treated conditions for p-c-MYC (Thr58).
